# Supplementary material
Source: HighWire-hosted journal article supplement (https://bmjopen.bmj.com/content/15/2/e090428)
Supplement: inline-supplementary-material-6 [file inline-supplementary-material-6.pdf]

**Supplementary table 6.** Risk of MACE among different follow-up period in N1 matched population.

|                  | HZ vaccine |              | No HZ vaccine |              | HR (95% C.I.)    |
|------------------|------------|--------------|---------------|--------------|------------------|
|                  | N          | No. of event | N             | No. of event |                  |
| Follow-up period |            |              |               |              |                  |
| ≤5 years         | 45,958     | 2,513        | 45,958        | 3,051        | 0.70 (0.66–0.74) |
| 5-10 years       | 43,445     | 812          | 42,798        | 799          | 0.93 (0.84–1.02) |
| >10 years        | 42,633     | 149          | 41,999        | 238          | 1.13 (0.92–1.39) |

MACE: major adverse cardiovascular events; HZ: herpes zoster  
N1 indicate any herpes zoster vaccination versus no herpes zoster vaccination population
