# Supplementary material
Source: HighWire-hosted journal article supplement (https://bmjopen.bmj.com/content/15/2/e090428)
Supplement: inline-supplementary-material-7 [file inline-supplementary-material-7.pdf]

**Supplementary table 7.** Stratification analysis of risk of MACE in different Shingrix dosage

|                  | HZ vaccine |              | No HZ vaccine |              | HR (95% C.I.)    |
|------------------|------------|--------------|---------------|--------------|------------------|
|                  | N          | No. of event | N             | No. of event |                  |
| Shingrix 1 dose  | 10760      | 546          | 10760         | 990          | 0.66 (0.59–0.73) |
| Shingrix 2 doses | 3237       | 167          | 3237          | 288          | 0.73 (0.59–0.89) |

MACE: major adverse cardiovascular events; HZ: herpes zoster
