# Supplementary material
Source: HighWire-hosted journal article supplement (https://bmjopen.bmj.com/content/15/2/e090428)
Supplement: inline-supplementary-material-11 [file inline-supplementary-material-11.pdf]

**Supplementary Table 9.** Risk of MACE in individuals who received the herpes zoster (HZ) vaccine compared to those who did not, with vaccination administered more than one year after a diabetes mellitus diagnosis.

|                                        | Exposure group |              | Comparison |              | HR (95% C.I.)    |
|----------------------------------------|----------------|--------------|------------|--------------|------------------|
|                                        | N              | No. of event | N          | No. of event |                  |
| <b>Any HZ vaccine vs no HZ vaccine</b> |                |              |            |              |                  |
| <b>(N1 matched population)</b>         |                |              |            |              |                  |
| MACE                                   | 138,083        | 17,009       | 138,083    | 27,096       | 0.58 (0.57–0.59) |
| Coronary artery disease                | 138,083        | 6,313        | 138,083    | 8,772        | 0.67 (0.65–0.69) |
| Stroke                                 | 138,083        | 5,999        | 138,083    | 7,656        | 0.74 (0.71–0.76) |
| All-cause mortality                    | 138,083        | 8,027        | 138,083    | 16,215       | 0.48 (0.46–0.49) |
| <b>Shingrix vs no HZ vaccine</b>       |                |              |            |              |                  |
| <b>(N2 matched population)</b>         |                |              |            |              |                  |
| MACE                                   | 45,904         | 5,063        | 45,904     | 9,926        | 0.62 (0.60–0.65) |
| Coronary artery disease                | 45,904         | 1,970        | 45,904     | 3,241        | 0.75 (0.71–0.80) |
| Stroke                                 | 45,904         | 1,831        | 45,904     | 2,831        | 0.79 (0.74–0.84) |
| All-cause mortality                    | 45,904         | 2,180        | 45,904     | 5,965        | 0.48 (0.46–0.51) |
| <b>Zostavax vs no HZ vaccine</b>       |                |              |            |              |                  |
| <b>(N3 matched population)</b>         |                |              |            |              |                  |
| MACE                                   | 33,350         | 8,024        | 33,350     | 6,280        | 0.61 (0.59–0.63) |
| Coronary artery disease                | 33,350         | 2,980        | 33,350     | 2,014        | 0.71 (0.67–0.75) |
| Stroke                                 | 33,350         | 3,072        | 33,350     | 1,805        | 0.82 (0.77–0.87) |
| All-cause mortality                    | 33,350         | 3,995        | 33,350     | 3,751        | 0.48 (0.46–0.50) |
| <b>Shingrix vs Zostavax</b>            |                |              |            |              |                  |
| <b>(N4 matched population)</b>         |                |              |            |              |                  |
| MACE                                   | 27,171         | 2,259        | 27,171     | 6,916        | 0.99 (0.94–1.04) |
| Coronary artery disease                | 27,171         | 900          | 27,171     | 2,555        | 1.08 (0.99–1.17) |
| Stroke                                 | 27,171         | 852          | 27,171     | 2,601        | 0.97 (0.89–1.06) |
| All-cause mortality                    | 27,171         | 851          | 27,171     | 3,556        | 0.91 (0.84–0.99) |

Any HZ vaccine: Shingrix or Zostavax; MACE: major adverse cardiovascular events; HZ: herpes zoster
