# Supplementary material
Source: HighWire-hosted journal article supplement (https://bmjopen.bmj.com/content/15/2/e090428)

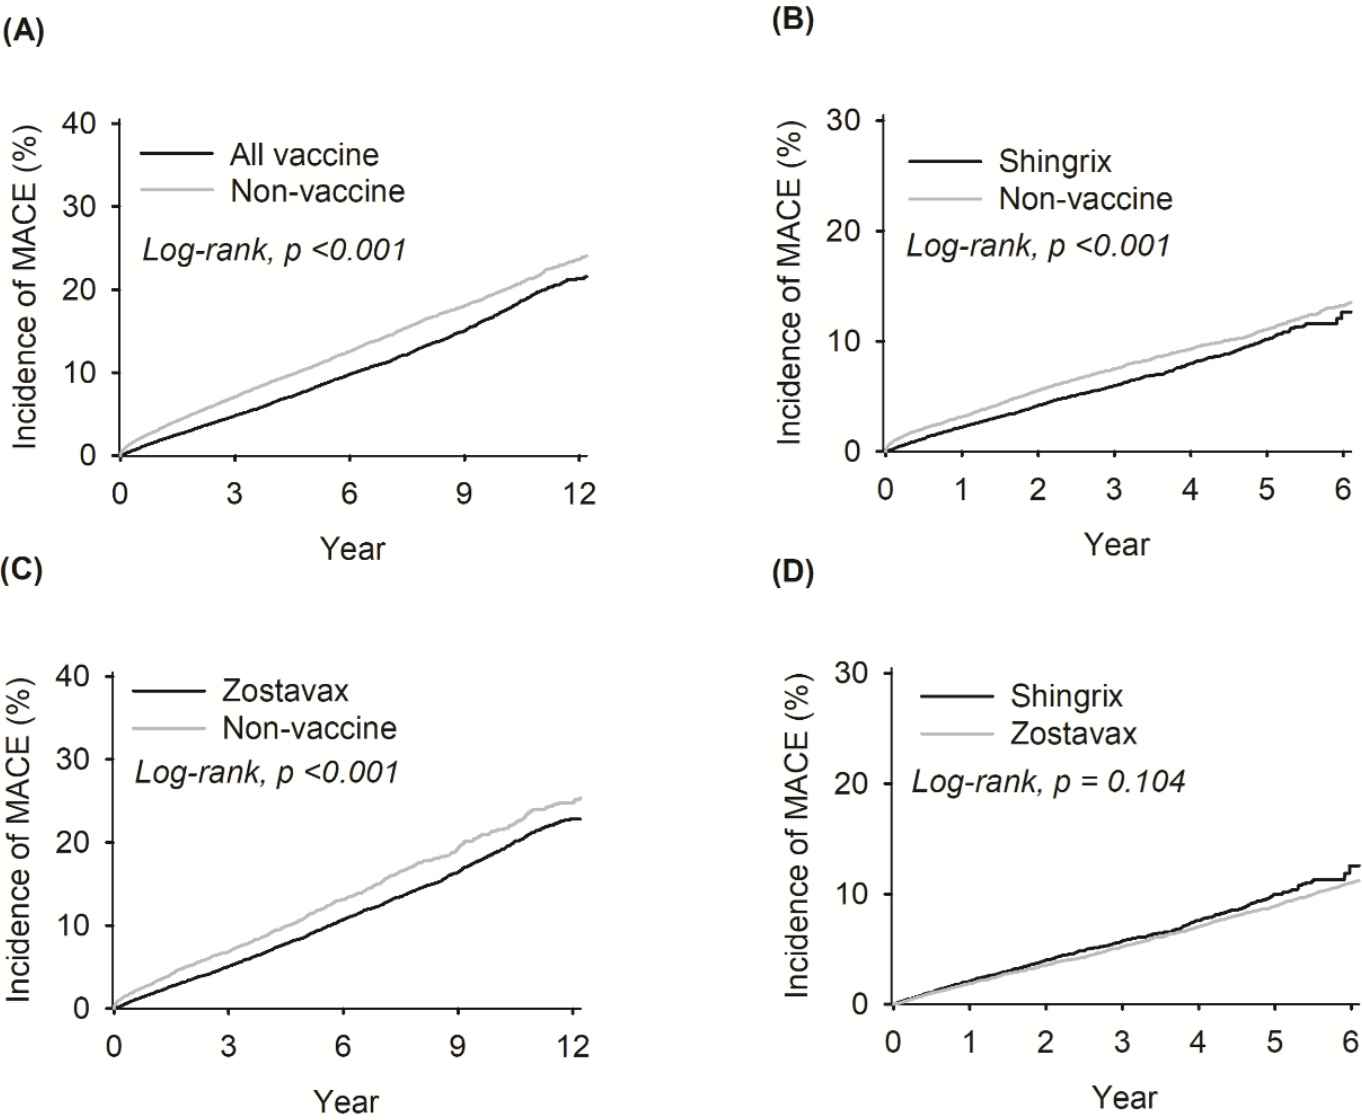

Supplement: inline-supplementary-material-12 [file inline-supplementary-material-12.pdf]

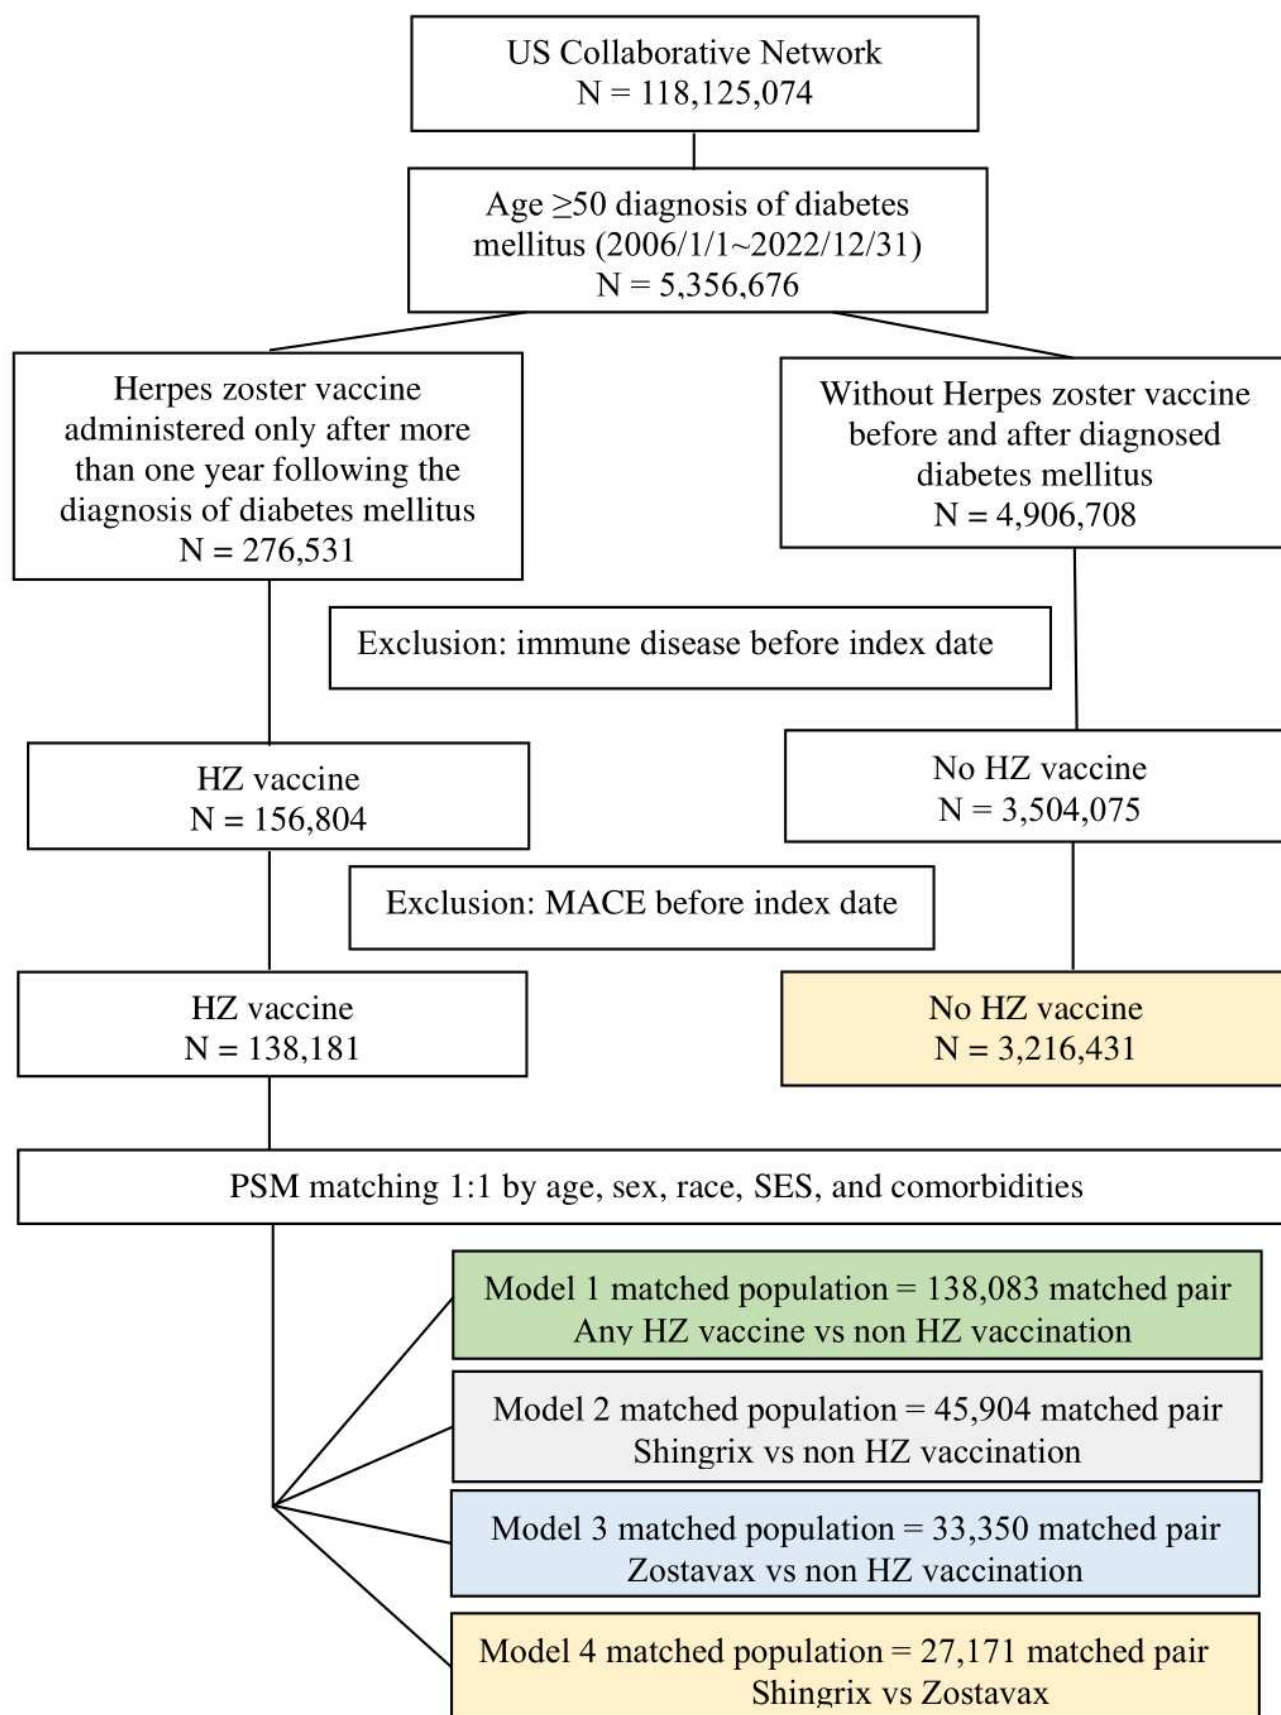

Supplement: inline-supplementary-material-8 [file inline-supplementary-material-8.pdf]
